# Supplementary material
Source: Springer Nature journal article supplement (https://www.springermedizin.de/resource/supplementary/12968_2013_3311_MOESM1_ESM.pdf/9583596)
Supplement: MOESM1 [file 9583596]

| Qualitative Criteria                       |                          |                   |                      |                                       |               |
|--------------------------------------------|--------------------------|-------------------|----------------------|---------------------------------------|---------------|
| LV-Function cine SSFP                      | 0                        | 1                 | 2                    | 3                                     | Maximum Score |
| 1. LV coverage                             | Full coverage            | -                 | Apex not covered     | Base or ≥1 slice in the stack missing | 5             |
| 2. Wrap around                             | No                       | 1 slice           | 2 slices             | ≥3 slices                             | } 3           |
| 3. Respiratory ghost                       | No                       | 1 slice           | 2 slices             | ≥3 slices                             |               |
| 4. Cardiac ghost                           | No                       | 1 slice           | 2 slices             | ≥3 slices                             |               |
| 5. Image blurring/mis-triggering           | No                       | 1 slice           | 2 slices             | ≥3 slices                             |               |
| 6. Metallic artifacts                      | No                       | 1 slice           | 2 slices             | ≥3 slices                             |               |
| 7. Shimming artifacts                      | No                       | 1 slice           | 2 slices             | ≥3 slices                             | } 2           |
| 8. Signal loss (coil inactive)             | Activated                | -                 | Not activated        | -                                     |               |
| 9. Orientation of stack                    | correct                  | -                 | incorrect            | -                                     | 2             |
| 10. Slice thickness                        | ≤ 10 mm                  | 11-15 mm          | -                    | > 15 mm                               | 3             |
| 11. Gap                                    | < 3 mm                   | 3-4 mm            | -                    | > 4 mm                                | 3             |
| 12. Correct LV long axes                   | ≥ 2                      | 1                 | -                    | None                                  | 3             |
| LV function score                          |                          |                   |                      |                                       | 21            |
| Late Gadolinium Enhancement                | 0                        | 1                 | 2                    | 3                                     |               |
| 13. LV coverage                            | Full coverage            | -                 | Apex not covered     | Base or ≥1 slice in the stack missing | 5             |
| 14. Wrap around                            | No                       | 1 slice           | 2 slices             | ≥3 slices                             | } 3           |
| 15. Respiratory ghost                      | No                       | 1 slice           | 2 slices             | ≥3 slices                             |               |
| 16. Cardiac ghost                          | No                       | 1 slice           | 2 slices             | ≥3 slices                             |               |
| 17. Image blurring/mis-trigger             | No                       | 1 slice           | 2 slices             | ≥3 slices                             |               |
| 18. Metallic artifacts                     | No                       | 1 slice           | 2 slices             | ≥3 slices                             |               |
| 19. Signal loss (coil inactive)            | Activated                | -                 | Not activated        | -                                     | 2             |
| 20. Slice thickness                        | ≥ 10 mm                  | 11-15 mm          | -                    | > 15 mm                               | 3             |
| 21. Gap                                    | < 3 mm                   | 3-4 mm            | -                    | > 4 mm                                | 3             |
| 22. Correct LV long axes                   | ≥ 2                      | 1                 | -                    | None                                  | 3             |
| LGE Score                                  |                          |                   |                      |                                       | 19            |
| First-Pass Perfusion                       | 0                        | 1                 | 2                    | 3                                     |               |
| 23. LV coverage                            | ≥ 3 slices               | -                 | 2 slices             | 1 slice                               | 3             |
| 24. In-plane spatial resolution            | < 3mm                    | -                 | -                    | ≥ 3 mm                                | 3             |
| 25. Acquisition window                     | < 150 ms                 | -                 | 150-250 ms           | > 250 ms                              | 3             |
| 26. Patient preparation                    | Drugs + caffeine stopped | Drugs not stopped | Caffeine not stopped | Drugs + caffeine not stopped          | 3             |
| 27. Wrap around                            | No                       | 1 slice           | 2 slices             | ≥3 slices                             | } 3           |
| 28. Respiratory ghost                      | No                       | 1 slice           | 2 slices             | ≥3 slices                             |               |
| 29. Cardiac ghost                          | No                       | 1 slice           | 2 slices             | ≥3 slices                             |               |
| 30. Image blurring                         | No                       | 1 slice           | 2 slices             | ≥3 slices                             |               |
| 31. Metallic artifacts                     | No                       | 1 slice           | 2 slices             | ≥3 slices                             |               |
| 32. Signal loss (coil inactive)            | Activated                | -                 | Not activated        | -                                     | 2             |
| 33. Breathing motion                       | -                        | Drift             | -                    | Abrupt                                | } 3           |
| 34. Mis-triggering                         | None                     | 1-2 mis-triggers  | -                    | >2 mis-triggers                       |               |
| 35. Rhythm                                 | Sinus                    | -                 | -                    | Atrial fibrillation                   |               |
| Perfusion Score                            |                          |                   |                      |                                       | 20            |
| Total Qualitative Score                    |                          |                   |                      |                                       | 60            |
| Quantitative Criteria                      |                          |                   |                      |                                       |               |
| 36. LGE SNR: anterior wall                 | >5                       | 2-5               | <2                   | -                                     | 2             |
| inferior wall                              | >5                       | 2-5               | <2                   | -                                     |               |
| 37. First Pass %SI increase: anterior wall | >200%                    | 100-200%          | <100%                | -                                     | 2             |
| inferior wall                              | >200%                    | 100-200%          | <100%                | -                                     |               |
| Total Quantitative Score                   |                          |                   |                      |                                       | 4             |
| Global Quality Score                       |                          |                   |                      |                                       | 64            |
